# Supplementary material for: Elucidating diversity in the class composition of the minicircle hypervariable region of Trypanosoma cruzi: New perspectives on typing and kDNA inheritance
Source: PubMed Central journal article supplement (PMC6619836; doi:10.1371/journal.pntd.0007536), 2019-06-27
Supplement: pntd.0007536.s001.pdf [file pntd.0007536.s001.pdf]

Table S1. Reads obtained after different steps in the pipeline

| Strain                          | TcI        |           | TcII      |           | TcIII     | TcIV      | TcV       |           | TcVI                       |           |
|---------------------------------|------------|-----------|-----------|-----------|-----------|-----------|-----------|-----------|----------------------------|-----------|
|                                 | PalDa20cl3 | TEV55cl1  | Esmeraldo | Tu18cl93  | X109/2    | CANIIIcl1 | LL014R1   | MNcl2     | LL015P68ROcl4 <sup>2</sup> |           |
|                                 |            |           |           |           |           |           |           |           | PCR 1                      | PCR 2     |
| Paired Reads                    | 2,728,193  | 2,305,460 | 2,328,934 | 2,307,362 | 2,551,201 | 1,450,910 | 2,003,702 | 2,442,318 | 2,192,191                  | 1,782,111 |
| Trimmed and merged              | 2,545,361  | 1,366,928 | 1,338,561 | 2,143,482 | 1,651,245 | 1,364,041 | 996,499   | 1,161,607 | 2,052,980                  | 1,672,075 |
| surviving reads after filtering | 2,356,494  | 1,202,355 | 1,201,724 | 2,000,770 | 1,492,887 | 1,267,374 | 827,756   | 982,028   | 1,895,845                  | 1,539,520 |
| Clustered <sup>1</sup>          | 2,338,845  | 1,176,820 | 1,130,408 | 1,989,294 | 1,442,654 | 1,211,349 | 821,081   | 972,706   | 1,871,580                  | NA        |

1. Number of sequences that were included into mHVR clusters defined at the 85% identity threshold.
2. Two independent PCR amplifications were made in order to determine reproducibility. Only reads from PCR 1 were used for comparisons with other strains.
