# Supplementary material for: Elucidating diversity in the class composition of the minicircle hypervariable region of Trypanosoma cruzi: New perspectives on typing and kDNA inheritance
Source: PubMed Central journal article supplement (PMC6619836; doi:10.1371/journal.pntd.0007536), 2019-06-27
Supplement: pntd.0007536.s002.pdf [file pntd.0007536.s002.pdf]

Table S2. Number of mHVR clusters defined at a threshold of 90% sequence identity for different strains

|                                  | TcI            |          | TcII      |              | TcIII  | TcIV      | TcV         |       | TcVI              |
|----------------------------------|----------------|----------|-----------|--------------|--------|-----------|-------------|-------|-------------------|
|                                  | PalDa20<br>cl3 | TEV55cl1 | Esmeraldo | Tu18<br>cl93 | X109/2 | CANIIIcl1 | LL014<br>R1 | MNcl2 | LL015<br>P68R0cl4 |
| mHVR Clusters                    | 320            | 227      | 347       | 151          | 371    | 142       | 69          | 67    | 107               |
| Rarefaction at 820,000 sequences |                |          |           |              |        |           |             |       |                   |
| mHVR clusters                    | 320            | 225.8    | 346       | 151          | 366.3  | 138       | 69          | 65    | 107               |
| Simpson Index<br>(diversity)     | 0.991          | 0.989    | 0.994     | 0.978        | 0.994  | 0.885     | 0.827       | 0.901 | 0.942             |
