# Supplementary material for: Elucidating diversity in the class composition of the minicircle hypervariable region of Trypanosoma cruzi: New perspectives on typing and kDNA inheritance
Source: PubMed Central journal article supplement (PMC6619836; doi:10.1371/journal.pntd.0007536), 2019-06-27
Supplement: pntd.0007536.s003.pdf [file pntd.0007536.s003.pdf]

Table S3. Number of mHVR clusters defined at a threshold of 95% sequence identity for different strains

|                                  | TcI            |          | TcII      |              | TcIII  | TcIV      | TcV         |       | TcVI              |
|----------------------------------|----------------|----------|-----------|--------------|--------|-----------|-------------|-------|-------------------|
|                                  | PalDa20<br>cl3 | TEV55cl1 | Esmeraldo | Tu18<br>cl93 | X109/2 | CANIIIcl1 | LL014<br>R1 | MNcl2 | LL015<br>P68ROcl4 |
| mHVR clusters                    | 317            | 222      | 332       | 148          | 369    | 141       | 68          | 66    | 107               |
| Rarefaction at 790,000 sequences |                |          |           |              |        |           |             |       |                   |
| mHVR clusters                    | 309            | 217      | 322.3     | 144          | 353.9  | 135.1     | 66          | 60.8  | 102               |
| Simpson Index<br>(diversity)     | 0.991          | 0.989    | 0.994     | 0.978        | 0.994  | 0.886     | 0.829       | 0.905 | 0.942             |
